# Supplementary material for: Co-designing a Self-Management App Prototype to Support People With Spinal Cord Injury in the Prevention of Pressure Injuries: Mixed Methods Study
Source: PubMed Central journal article supplement (PMC7380902; doi:10.2196/18018), 2020-07-09

# Multimedia Appendix 1

## Ideation Workshop

### Prevention types and their (assumed) preferences

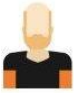

Delegierende

Trifft hauptsächlich "passive" Präventionsmaßnahmen und delegiert an unterstützende Angehörige und Spitzex z. B. er hat eine Luftmatratze gekauft und ist wütend wenn trotz der Matratze ein Dekubitus entsteht.

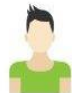

Selektive

Trifft einige der empfohlenen Präventionsmaßnahmen, basierend auf seinem Erfahrungswissen z. B. er kontrolliert nicht regelmäßig die Stellen, wo er nie etwas gehabt hat.

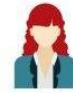

Umsichtige

Trifft alle empfohlenen Präventionsmaßnahmen.

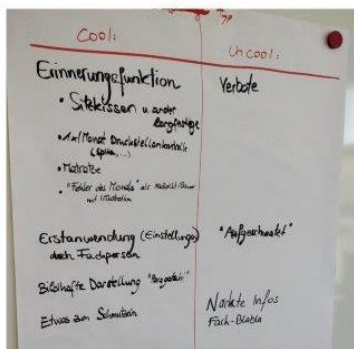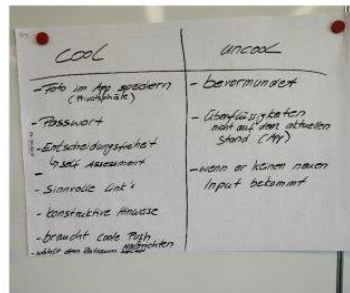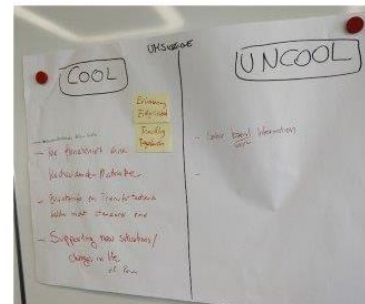

### Generating ideas for "translation" of clinical guidelines into app content and functions

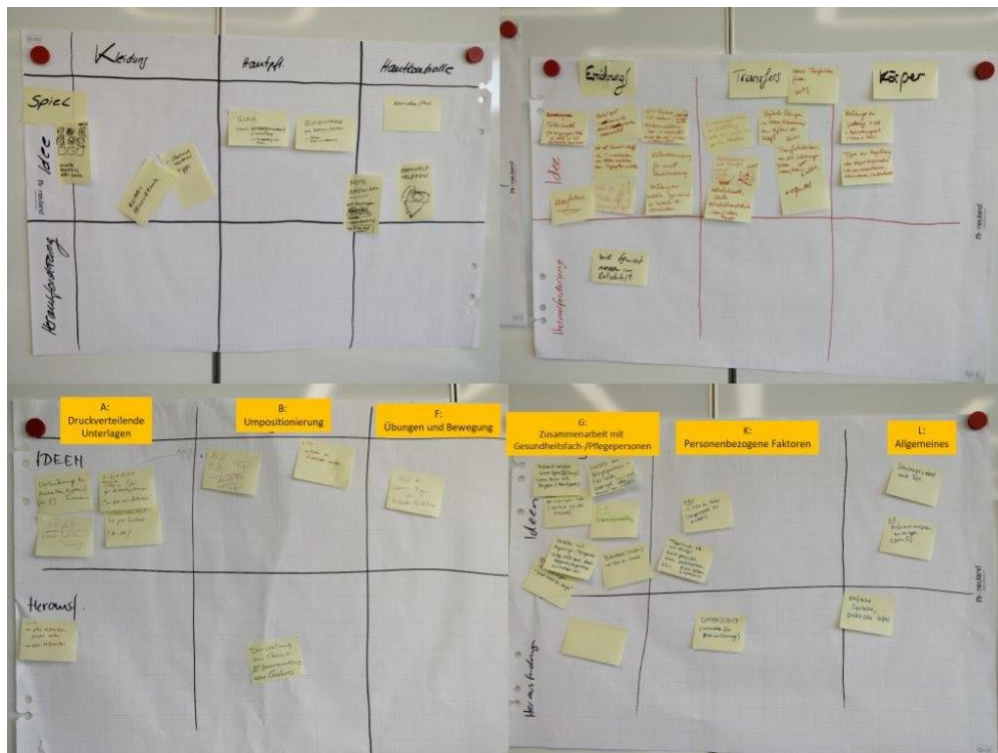



## User-interface sketching

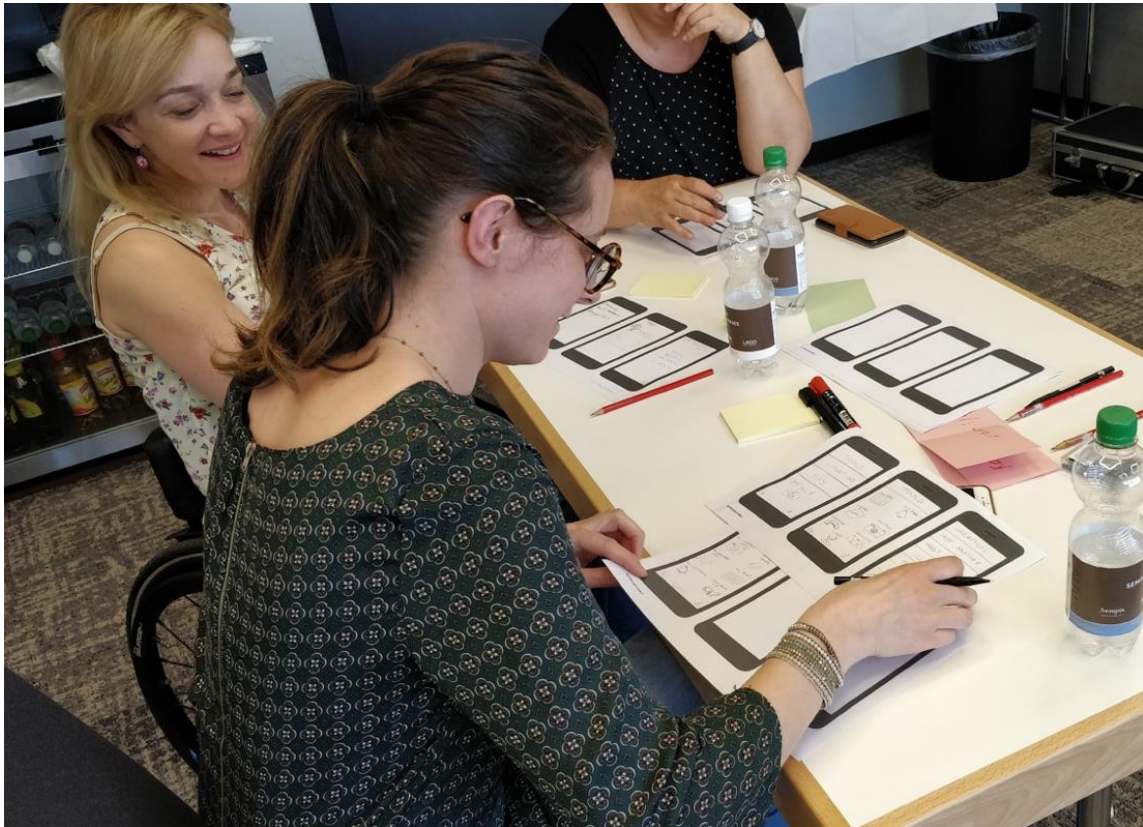

Supplement: mhealth_v8i7e18018_app1.pdf [file mhealth_v8i7e18018_app1.pdf]
