# Supplementary material for: Co-designing a Self-Management App Prototype to Support People With Spinal Cord Injury in the Prevention of Pressure Injuries: Mixed Methods Study
Source: PubMed Central journal article supplement (PMC7380902; doi:10.2196/18018), 2020-07-09

# Multimedia Appendix 2

## Usability Testing

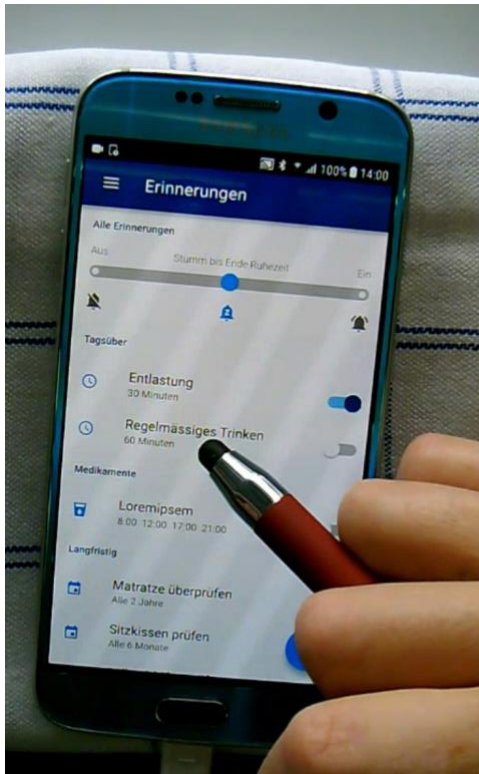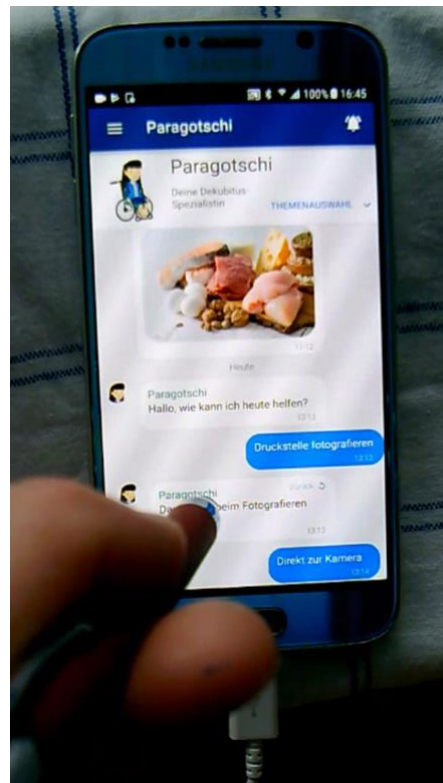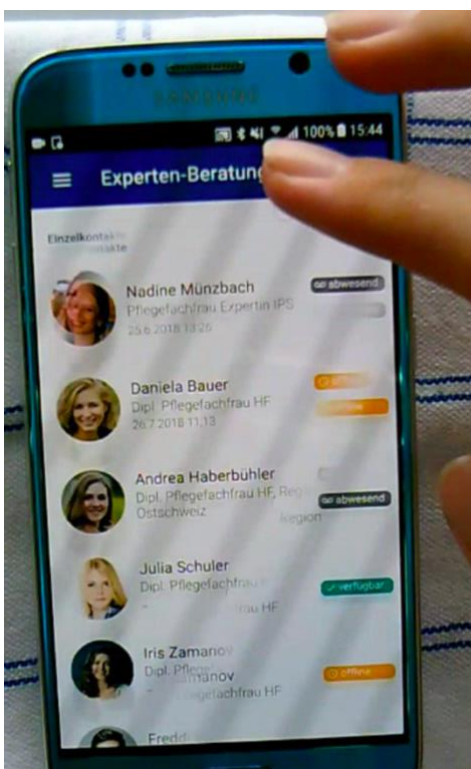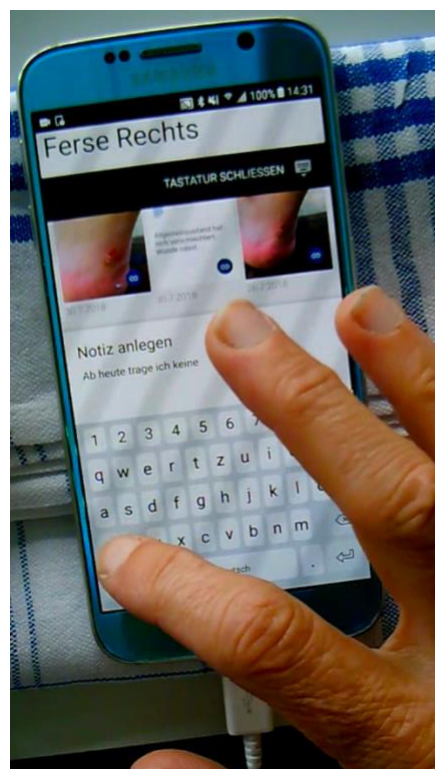

Supplement: mhealth_v8i7e18018_app2.pdf [file mhealth_v8i7e18018_app2.pdf]
