# Supplementary material for: Co-designing a Self-Management App Prototype to Support People With Spinal Cord Injury in the Prevention of Pressure Injuries: Mixed Methods Study
Source: PubMed Central journal article supplement (PMC7380902; doi:10.2196/18018), 2020-07-09
Supplement: mhealth_v8i7e18018_app3.pdf [file mhealth_v8i7e18018_app3.pdf]

# Multimedia Appendix 3

## Interview guide

### 1. Experience in using apps and specifically health apps

- a) Do you use apps in your everyday life? If so, what kind of apps?
- b) Do you also use health apps? If so, which ones (and for what)?
- c) Why do you use (no) health apps? What kind of experience have you had?

### 2. General assessment of prototype

- a) What is your first impression of the app prototype?

### 3. Perceived usability of the app prototype

- a) Did you have difficulties in completing the 11 tasks?
- b) How did you feel about handling and navigation of the app?
- c) Did you find your way around the app well or not so well?
- d) Did you find the app clear or rather confusing?
- e) Were there things that surprised you or that you did not understand?

### 4. Perceived benefits of the app

- a) How would you use the app in your everyday life?
- b) Are there certain features or content that you find particularly useful, and if so, why?
- c) Are there any situations where the app could be particularly useful in your daily life?
- d) Would you recommend the app to someone? If so, to whom and why?

### 5. Attitudes towards using the app

- a) Where do you see the advantages and disadvantages of the app?
- b) Do you see any risks?

### 6. Intention to use the app

- a) Can you imagine using the app in your everyday life in the future?
- b) If not, why not?
- c) Would you use this app to communicate with healthcare professionals?
  - i. If so, what do you see as the benefits?
  - ii. If not, why not? What risks do you see?

### 7. Suggestions for improvement

- a) What did you particularly like?
- b) Was something missing?
