# Supplementary material for: Co-designing a Self-Management App Prototype to Support People With Spinal Cord Injury in the Prevention of Pressure Injuries: Mixed Methods Study
Source: PubMed Central journal article supplement (PMC7380902; doi:10.2196/18018), 2020-07-09
Supplement: mhealth_v8i7e18018_app4.pdf [file mhealth_v8i7e18018_app4.pdf]

# Multimedia Appendix 4

## Core Themes and matching Functions (Phase 1)

| <b>Prospective users' needs/desires</b> | <b>App prototype functions</b> |                       |
|-----------------------------------------|--------------------------------|-----------------------|
| Self-management component (individual)  |                                |                       |
| Assist disease monitoring               | Smart camera                   | Pressure injury diary |
| Provide disease knowledge               | Knowledge repository           | Reminders             |
| Provide motivational support            | Reminders                      |                       |
|                                         |                                |                       |
| Communication component (interaction)   |                                |                       |
| General expert inquiries                | Expert consultation            |                       |
| Acute expert feedback                   | Expert consultation            |                       |
